# Supplementary material for: Leveraging efficiency metrics for the optimization of CELMoDs™ as cereblon-based molecular glue degraders
Source: Royal Society of Chemistry journal article supplement (doi:10.1039/d4md00870g), 2025-01-01
Supplement: d4md00870g1.pdf [file d4md00870g1.pdf]

## Supporting Information

# Leveraging Efficiency Metrics for the Optimization of CELMoDs™ as Cereblon-based Molecular Glue Degraders

Lei Jia<sup>1,#</sup>, Jennifer R. Riggs<sup>1,#</sup>, Dahlia Weiss<sup>2</sup>, Brian L. Claus<sup>3</sup>, Veerabahu Shanmugasundaram<sup>4</sup>,  
Stephen R. Johnson<sup>3</sup>, and Christoph W. Zapf<sup>1\*</sup>

1 Bristol Myers Squibb, 10300 Campus Point Dr. Suite 100 San Diego, CA 92121

2 Bristol Myers Squibb, 700 Bay Rd, Redwood City, CA 94063

3 Bristol Myers Squibb, 3551 Lawrenceville Rd, Lawrence Township, NJ 08648

4 Bristol Myers Squibb, 250 Water St, Cambridge, MA 02141

# These authors contributed equally

\*Corresponding author: Christoph W. Zapf: [Christoph.Zapf@bms.com](mailto:Christoph.Zapf@bms.com)

## Table of Content

|                                     |   |
|-------------------------------------|---|
| Table of Content .....              | 2 |
| Data Availability Statement: .....  | 3 |
| Table S1: Disclosed Structures..... | 3 |

### Data Availability Statement:

Internal program data was used for the purpose of this retrospective analysis. Profiles of 5 early-stage, 8 middle-stage and 2 late-stage lead compounds were used to track progress during LO phase of the program. The early, middle and late stage were defined by the chronological order of lead optimization progress. Structural data for 8 compounds, include 4 early-stage, 3 middle-stage and 1 late-stage (CC-99282), are disclosed in Table S1.

**Table S1: Disclosed Structures**

| ID         | Lead_Stage   | SMILES                                                                                           | Formula      |
|------------|--------------|--------------------------------------------------------------------------------------------------|--------------|
| Compound 1 | Early-stage  | <chem>FC1=CC(F)=C(C=C1)N1CCN(CC2=CC=C(CNC3=C4C(=O)N(C5CCC(=O)NC5=O)C(=O)C4=CC=C3)C=C2)CC1</chem> | C31H29F2N5O4 |
| Compound 2 | Early-stage  | <chem>FC1=CC=C(C=C1)N1CCN(CC2=CC=C(CNC3=C4C(=O)N(C5CCC(=O)NC5=O)C(=O)C4=CC=C3)C=C2)CC1</chem>    | C31H30FN5O4  |
| Compound 3 | Early-stage  | <chem>ClC1=CC=C(C=C1)N1CCN(CC2=CC=C(CNC3=C4C(=O)N(C5CCC(=O)NC5=O)C(=O)C4=CC=C3)C=C2)CC1</chem>   | C31H30ClN5O4 |
| Compound 4 | Early-stage  | <chem>FC1=C(C=CC(=C1)C#N)N1CCN(CC2=CC=C(CNC3=CC=CC4=C3C(=O)N(C3CCC(=O)NC3=O)C4=O)C=C2)CC1</chem> | C32H29FN6O4  |
| Compound 5 | Middle-stage | <chem>NC(=O)C1=NC=C(C=C1)N1CCN(CC2=CC=C(CNC3=CC=CC4=C3C(=O)N(C3CCC(=O)NC3=O)C4=O)C=C2)CC1</chem> | C31H31N7O5   |
| Compound 6 | Middle-stage | <chem>FC1=CN=C(C=C1)N1CCN(CC2=CC=C(CNC3=CC=CC4=C3C(=O)N(C3CCC(=O)NC3=O)C4=O)C=C2)CC1</chem>      | C30H29FN6O4  |
| Compound 7 | Middle-stage | <chem>FC1=CC(CN2CC3(CCC3)C2)=CC=C1CNC1=C2C(=O)N(C3CCC(=O)NC3=O)C(=O)C2=CC=C1</chem>              | C27H27FN4O4  |
| CC-99282   | Late-stage   | <chem>O=C1CC[C@H](N2C(=O)C3=CC=CC(NCC4=CC=C(CN5CC(N6CCOCC6)C5)C=C4F)=C3C2=O)C(=O)N1</chem>       | C28H30FN5O5  |
